# Supplementary material for: Manganese halide hybrids with a reversible luminous color and their application for a white light-emitting diode
Source: Royal Society of Chemistry journal article supplement (doi:10.1039/d2ce00883a), 2022-01-01
Supplement: d2ce00883a1.pdf [file d2ce00883a1.pdf]

**Supplementary Information for**  
**Manganese Halide Hybrids for Reversible Luminous Color and**  
**Application fro White Light-emitting Diode**

*Hanmei Fu,<sup>a</sup> Chunli Jiang,<sup>a\*</sup> Chunhua Luo,<sup>a</sup> Hechun Lin,<sup>a</sup> and Hui Peng<sup>a,b\*</sup>*

- a. Key Laboratory of Polar Materials and Devices (MOE), Department of Electronics, School of Physics and Electronic Science, East China Normal University, Shanghai, 200241, China. E-mail: cljiang@ee.ecnu.edu.cn; hpeng@ee.ecnu.edu.cn
- b. Collaborative Innovation Center of Extreme Optics, Shanxi University, Taiyuan, Shanxi 030006, China.

Table S1. Crystallographic data and structure refinements of  $(C_5H_8N_2)_2MnCl_4$

| Empirical formula                   | $(C_5H_8N_2)_2MnCl_4$ |
|-------------------------------------|-----------------------|
| Formula weight, g mol <sup>-1</sup> | 389.01                |
| Crystal system                      | monoclinic            |
| Temperature, K                      | 289 K                 |
| Space group                         | $P2_1$                |
| a, Å                                | 13.3355 (6)           |
| b, Å                                | 7.8283 (3)            |
| c, Å                                | 16.6774 (8)           |
| Volume, Å <sup>3</sup>              | 1738.81 (13)          |
| $\alpha$ , °                        | 90                    |
| $\beta$ , °                         | 92.888 (2)            |
| $\gamma$ , °                        | 90                    |
| Z                                   | 4                     |
| density, g·cm <sup>-3</sup>         | 1.486                 |

|                                                   |                                                            |
|---------------------------------------------------|------------------------------------------------------------|
| Limiting indices                                  | $-15 \leq h \leq 15, -9 \leq k \leq 9, -19 \leq l \leq 19$ |
| $F(000)$                                          | 1024                                                       |
| Reflections collected                             | 16899                                                      |
| Reflections unique                                | 5996 [ $R(\text{int}) = 0.0626$ ]                          |
| Completeness to $\theta = 66.715$ , %             | 99.5                                                       |
| Refinement method                                 | Full-matrix least-squares on $F^2$                         |
| Data/restraints/parameters                        | 5996/1/347                                                 |
| Theta range for data collection, °                | 3.318 to 66.715                                            |
| Goodness-of-fit on $F^2$                          | 1.272                                                      |
| Absorption coefficient, $\text{mm}^{-1}$          | 11.769                                                     |
| Final $R$ indices [ $I > 2\delta(I)$ ]            | $R_1 = 0.0702, wR_2 = 0.1735$                              |
| $R$ indices (all data)                            | $R_1 = 0.0786, wR_2 = 0.1815$                              |
| Largest diff. peak and hole, $\text{e. \AA}^{-3}$ | 0.564 and -1.586                                           |

Table S2. Anisotropic displacement parameters ( $\text{\AA}^2 \times 10^3$ ) for  $(\text{C}_5\text{H}_8\text{N}_2)_2\text{MnCl}_4$  at 289 K

|     | $U^{11}$ | $U^{22}$ | $U^{33}$ | $U^{23}$ | $U^{13}$ | $U^{12}$ |
|-----|----------|----------|----------|----------|----------|----------|
| Mn1 | 24(1)    | 15(1)    | 27(1)    | -1(1)    | 12(1)    | -5(1)    |
| Cl1 | 56(2)    | 59(2)    | 67(2)    | -22(2)   | 36(2)    | -43(2)   |
| N1  | 56(6)    | 30(5)    | 38(5)    | 11(4)    | 0(4)     | -11(5)   |
| C1  | 44(6)    | 29(5)    | 50(7)    | -4(5)    | 5(5)     | -11(5)   |
| Mn2 | 24(1)    | 17(1)    | 29(1)    | 1(1)     | 12(1)    | -5(1)    |
| Cl2 | 40(2)    | 27(1)    | 53(2)    | 5(1)     | 18(1)    | 10(1)    |
| N2  | 32(5)    | 20(4)    | 48(6)    | -8(4)    | 12(4)    | -9(4)    |
| C2  | 49(6)    | 20(4)    | 38(6)    | 0(4)     | 5(5)     | 10(4)    |
| Cl3 | 49(2)    | 42(2)    | 37(2)    | 1(1)     | -3(1)    | -12(1)   |
| N3  | 34(6)    | 184(16)  | 44(7)    | -18(9)   | 6(5)     | 30(8)    |

---

|     |        |        |         |        |       |        |
|-----|--------|--------|---------|--------|-------|--------|
| C3  | 45(7)  | 16(5)  | 53(8)   | -1(5)  | -4(6) | 2(4)   |
| C14 | 43(2)  | 25(1)  | 52(2)   | -4(1)  | 29(1) | 1(1)   |
| N4  | 28(5)  | 27(4)  | 39(5)   | 2(4)   | 9(4)  | 0(4)   |
| C4  | 43(7)  | 56(7)  | 60(8)   | 2(7)   | 1(6)  | 2(6)   |
| C15 | 44(2)  | 26(1)  | 48(2)   | -7(1)  | 29(1) | 0(1)   |
| N5  | 22(4)  | 22(4)  | 29(5)   | 2(4)   | 6(3)  | -3(4)  |
| C5  | 61(9)  | 91(11) | 60(9)   | 1(9)   | 16(7) | -3(8)  |
| C16 | 50(2)  | 45(2)  | 40(2)   | 5(1)   | -5(1) | -8(1)  |
| N6  | 56(6)  | 29(5)  | 34(5)   | -5(4)  | 18(4) | 16(4)  |
| C6  | 73(8)  | 5(4)   | 46(7)   | 3(4)   | -8(6) | -6(5)  |
| C17 | 41(2)  | 28(1)  | 49(2)   | 11(1)  | 14(1) | 17(1)  |
| N7  | 24(4)  | 18(4)  | 24(4)   | 0(3)   | 6(3)  | 0(3)   |
| C7  | 31(6)  | 50(7)  | 36(6)   | 1(5)   | 13(5) | -29(5) |
| C18 | 54(2)  | 60(2)  | 66(2)   | -18(2) | 34(2) | -40(2) |
| N8  | 58(6)  | 31(5)  | 48(6)   | 6(5)   | 3(5)  | 12(4)  |
| C8  | 51(7)  | 13(4)  | 35(6)   | 8(4)   | 4(5)  | 0(4)   |
| C9  | 36(7)  | 76(10) | 101(13) | -34(9) | 32(7) | -6(7)  |
| C10 | 88(12) | 83(11) | 82(11)  | -22(9) | 64(9) | -31(9) |
| C11 | 25(5)  | 50(6)  | 27(6)   | 4(5)   | 18(4) | 11(5)  |
| C12 | 38(6)  | 31(5)  | 45(7)   | -2(5)  | 0(5)  | -9(5)  |
| C13 | 26(5)  | 31(5)  | 33(6)   | 0(5)   | 13(4) | -11(4) |
| C14 | 52(7)  | 28(5)  | 36(6)   | -18(5) | 15(5) | -14(5) |
| C15 | 50(7)  | 36(6)  | 81(10)  | -32(7) | 15(6) | -5(6)  |
| C16 | 39(6)  | 19(4)  | 44(7)   | 3(5)   | 8(5)  | -2(5)  |
| C17 | 52(7)  | 14(4)  | 47(7)   | -4(5)  | -4(5) | -3(5)  |
| C18 | 27(5)  | 26(5)  | 53(7)   | -11(5) | 7(5)  | -6(4)  |

---

|     |       |       |       |        |        |       |
|-----|-------|-------|-------|--------|--------|-------|
| C19 | 46(6) | 29(5) | 30(6) | 1(4)   | -12(5) | -8(5) |
| C20 | 58(7) | 20(5) | 70(9) | -10(5) | -3(6)  | 9(5)  |

The anisotropic displacement factor exponent takes the form:

$$-2 \pi^2 [ h^2 a^{*2} U^{11} + \dots + 2 h k a^* b^* U^{12} ]$$

Table S3. The basic bond lengths (Å) and angles (°) of (C<sub>5</sub>H<sub>8</sub>N<sub>2</sub>)<sub>2</sub>MnCl<sub>4</sub> at 289 K

|         |            |             |             |
|---------|------------|-------------|-------------|
| Mn1-Cl1 | 2.348 (3)  | Cl1-Mn1-Cl3 | 111.03 (13) |
| Mn1-Cl2 | 2.371 (3)  | Cl1-Mn1-Cl2 | 110.04 (14) |
| Mn1-Cl3 | 2.351 (3)  | Cl3-Mn1-Cl2 | 111.82 (12) |
| Mn1-Cl4 | 2.369 (3)  | Cl1-Mn1-Cl4 | 111.59 (11) |
| N1-C1   | 1.336 (14) | Cl3-Mn1-Cl4 | 108.04 (13) |
| N1-C2   | 1.405 (12) | Cl2-Mn1-Cl4 | 104.12 (11) |
| C1-N2   | 1329 (13)  | C1-N1-C2    | 110.3 (10)  |
| C1-H1   | 0.9300     | N1-C1-N2    | 107.4 (10)  |
| Mn2-Cl8 | 2.346 (3)  | N1-C1-H1    | 126.3       |
| Mn2-Cl6 | 2.358 (3)  | N2-C1-H1    | 126.3       |
| Mn2-Cl5 | 2.363 (3)  | Cl8-Mn2-Cl6 | 111.45 (13) |
| Mn2-Cl7 | 2.373 (3)  | Cl8-Mn2-Cl5 | 111.80 (11) |
| N2-C3   | 1.359 (13) | Cl6-Mn2-Cl5 | 107.94 (13) |
| N2-C4   | 1.466 (13) | Cl8-Mn2-Cl7 | 110.06 (13) |
| C2-C3   | 1.355 (15) | Cl6-Mn2-Cl7 | 111.27 (11) |
| C2-H2   | 0.9300     | Cl5-Mn2-Cl7 | 104.08 (11) |
| N3-C7   | 1.29 (2)   | C1-N2-C3    | 108.9 (8)   |
| N3-C8   | 1.356 (16) | C1-N2-C4    | 123.3 (10)  |
| C3-H3   | 0.9300     | C3-N2-C4    | 127.8 (10)  |
| N4-C6   | 1.320 (13) | C3-C2-N1    | 103.5 (9)   |
| N4-C8   | 1.384 (13) | C3-C2-H2    | 128.3       |

---

|          |            |            |            |
|----------|------------|------------|------------|
| N4-C9    | 1.477 (12) | N1-C2-H2   | 128.3      |
| C4-C5    | 1.448 (16) | C7-N3-C8   | 111.6 (11) |
| C4-H4A   | 0.9700     | C2-C3-N2   | 109.9 (9)  |
| C4-H4B   | 0.9700     | C2-C3-H3   | 125.1      |
| N5-C11   | 1.312 (11) | N2-C3-H3   | 125.1      |
| N5-C13   | 1.378 (12) | C6-N4-C8   | 107.0 (8)  |
| N5-C14   | 1.509 (13) | C6-N4-C9   | 129.8 (11) |
| C5-H5A   | 0.9600     | C8-N4-C9   | 123.2 (10) |
| C5-H5B   | 0.9600     | C5-C4-N2   | 111.1 (10) |
| C5-H5C   | 0.9600     | C5-C4-H4A  | 109.5      |
| N6-C11   | 1.292 (15) | N2-C4-H4A  | 109.5      |
| N6-C12   | 1.375 (13) | C5-C4-H4B  | 109.3      |
| C6-C7    | 1.227 (15) | N2-C4-H4B  | 109.4      |
| C6-H6    | 0.9300     | H4A-C4-H4B | 108.0      |
| N7-C16   | 1.320 (12) | C11-N5-C13 | 109.3 (9)  |
| N7-C18   | 1.351 (12) | C11-N5-C14 | 125.9 (9)  |
| N7-C19   | 1.449 (13) | C13-N5-C14 | 124.7 (8)  |
| C7-H7    | 0.9300     | C4-C5-H5A  | 109.5      |
| N8-C17   | 1.362 (14) | C4-C5-H5B  | 109.4      |
| N8-C16   | 1.372 (15) | H5A-C5-H5B | 109.5      |
| C8-H8    | 0.9300     | C4-C5-H5C  | 109.5      |
| C9-C10   | 1.44 (2)   | H5A-C5-H5C | 109.5      |
| C9-H9A   | 0.9700     | H5B-C5-H5C | 109.5      |
| C9-H9B   | 0.9700     | C11-N6-C12 | 109.9 (9)  |
| C10-H10A | 0.9600     | C7-C6-N4   | 111.8 (9)  |
| C10-H10B | 0.9600     | C7-C6-H6   | 124.1      |

---

---

|            |            |               |            |
|------------|------------|---------------|------------|
| C10-H10C   | 0.9600     | N4-C6-H6      | 124.1      |
| C11-H11    | 0.9300     | C16-N7-C18    | 109.7 (9)  |
| C12-C13    | 1.320 (15) | C16-N7-C19    | 124.7 (9)  |
| C12-H12    | 0.9300     | C18-N7-C19    | 125.5 (9)  |
| C13-H13    | 0.9300     | C6-C7-N3      | 108.2 (10) |
| C14-C15    | 1.436 (17) | C6-C7-H7      | 125.9      |
| C14-H14A   | 0.9700     | N3-C7-H7      | 125.9      |
| C14-H14B   | 0.9700     | C17-N8-C16    | 107.0 (10) |
| C15-H15A   | 0.9600     | N4-C8-N3      | 101.4 (10) |
| C15-H15B   | 0.9600     | N4-C8-H8      | 129.3      |
| C15-H15C   | 0.9600     | N3-C8-H8      | 129.3      |
| C16-H16    | 0.9300     | C10-C9-N4     | 114.8 (13) |
| C17-C18    | 1.370 (15) | C10-C9-H9A    | 108.6      |
| C17-H17    | 0.9300     | N4-C9-H9A     | 108.6      |
| C18-H18    | 0.9300     | C10-C9-H9B    | 108.5      |
| C19-C20    | 1.537 (14) | N4-C9-H9B     | 108.5      |
| C19-H19A   | 0.9700     | H9A-C9-H9B    | 107.5      |
| C19-H19B   | 0.9700     | C9-C10-H10A   | 109.5      |
| C20-H20A   | 0.9600     | C9-C10-H10B   | 109.4      |
| C20-H20B   | 0.9600     | H10A-C10-H10B | 109.5      |
| C20-H20C   | 0.9600     | C9-C10-H10C   | 109.5      |
| N7-C16-N8  | 108.3 (10) | H10A-C10-H10C | 109.5      |
| N7-C16-H16 | 125.8      | H10B-C10-H10C | 109.5      |
| N8-C16-H16 | 125.8      | N6-C11-N5     | 107.7 (10) |
| N8-C17-C18 | 107.9 (10) | N6-C11-H11    | 126.1      |
| N8-C17-H17 | 126.1      | N5-C11-H11    | 126.1      |

---

|               |           |               |           |
|---------------|-----------|---------------|-----------|
| C18-C17-H17   | 126.1     | C13-C12-N6    | 106.7 (9) |
| N7-C18-C17    | 106.9 (9) | C13-C12-H12   | 126.6     |
| N7-C18-H18    | 126.5     | N6-C12-H12    | 126.6     |
| C17-C18-H18   | 126.5     | C12-C13-N5    | 106.3 (9) |
| N7-C19-H19A   | 109.0     | C12-C13-H13   | 126.9     |
| C20-C19-H19A  | 109.0     | N5-C13-H13    | 126.8     |
| N7-C19-H19A   | 109.0     | C15-C14-N5    | 111.7 (9) |
| C20-C19-H19A  | 109.0     | C15-C14-H14A  | 109.3     |
| H19A-C19-H19B | 107.8     | N5-C14-H14A   | 109.3     |
| C19-C20-H20A  | 109.4     | C15-C14-H14B  | 109.3     |
| C19-C20-H20B  | 109.5     | N5-C14-H14B   | 109.3     |
| H20A-C20-H20B | 109.5     | H14A-C14-H14B | 108.0     |
| C19-C20-H20C  | 109.5     | C14-C15-H15A  | 109.5     |
| H20A-C20-H20C | 109.5     | C14-C15-H15B  | 109.5     |
| H20B-C20-H20C | 109.5     | H15A-C15-H15B | 109.5     |
| H15B-C15-H15C | 109.5     | C14-C15-H15C  | 109.4     |
| H15A-C15-H15C | 109.5     |               |           |

Symmetry transformations used to generate equivalent atoms:

#1 -x+1,-y,-z+1      #2 -x+2,-y+1,-z+1

Table S4. Hydrogen bond lengths and angles (Å, °) for C—H···Cl interaction of (C<sub>5</sub>H<sub>8</sub>N<sub>2</sub>)<sub>2</sub>MnCl<sub>4</sub> at 289 K

| <i>D</i> —H··· <i>A</i> | <i>D</i> —H | H··· <i>A</i> | <i>D</i> — <i>A</i> | ∠ <i>D</i> —H··· <i>A</i> |
|-------------------------|-------------|---------------|---------------------|---------------------------|
| C7—H7···C14             | 0.9300      | 2.5440        | 3.2578              | 133.754                   |
| C17—H17···C15           | 0.9300      | 2.6630        | 3.5336              | 156.054                   |
| C9—H9A···C17            | 0.9700      | 2.8270        | 3.7139              | 152.743                   |
| C4—H4B···C12            | 0.9700      | 2.8320        | 3.7363              | 155.422                   |

Table S5. The supporting information of these fabricated LEDs

| Sample | $R_m$ | Driven current (mA) | Chromaticity coordinate | CCT (K) |
|--------|-------|---------------------|-------------------------|---------|
| B      | 0:0   | 20                  | (0.1585, 0.0264)        | 1875    |
| G      | 10:0  | 20                  | (0.2014, 0.5922)        | 8235    |
| R      | 0:10  | 20                  | (0.6424, 0.3439)        | 9423    |
| m1     | 2:3   | 20                  | (0.3529, 0.3615)        | 4748    |
| m2     | 5:7   | 20                  | (0.3480, 0.3513)        | 4881    |
| m3     | 3:4   | 20                  | (0.3444, 0.3389)        | 4971    |
| m4     | 13:17 | 20                  | (0.3350, 0.3332)        | 5368    |
| m5     | 9:11  | 20                  | (0.3242, 0.3277)        | 5896    |
| m6     | 7:8   | 20                  | (0.3123, 0.3310)        | 6516    |
| m4     | 13:17 | 50                  | (0.3222, 0.3353)        | 5982    |
| m4     | 13:17 | 80                  | (0.3258, 0.3439)        | 5797    |
| m4     | 13:17 | 110                 | (0.3308, 0.3462)        | 5573    |
| m4     | 13:17 | 140                 | (0.3272, 0.3445)        | 5733    |
| m'     | 11:13 | 20                  | (0.3245, 0.3159)        | 5902    |

$R_m$ : mass ratio of  $(C_5H_8N_2)_2MnCl_4$  and  $C_5H_8N_2(MnCl_2)_xCl_y$  phosphors.



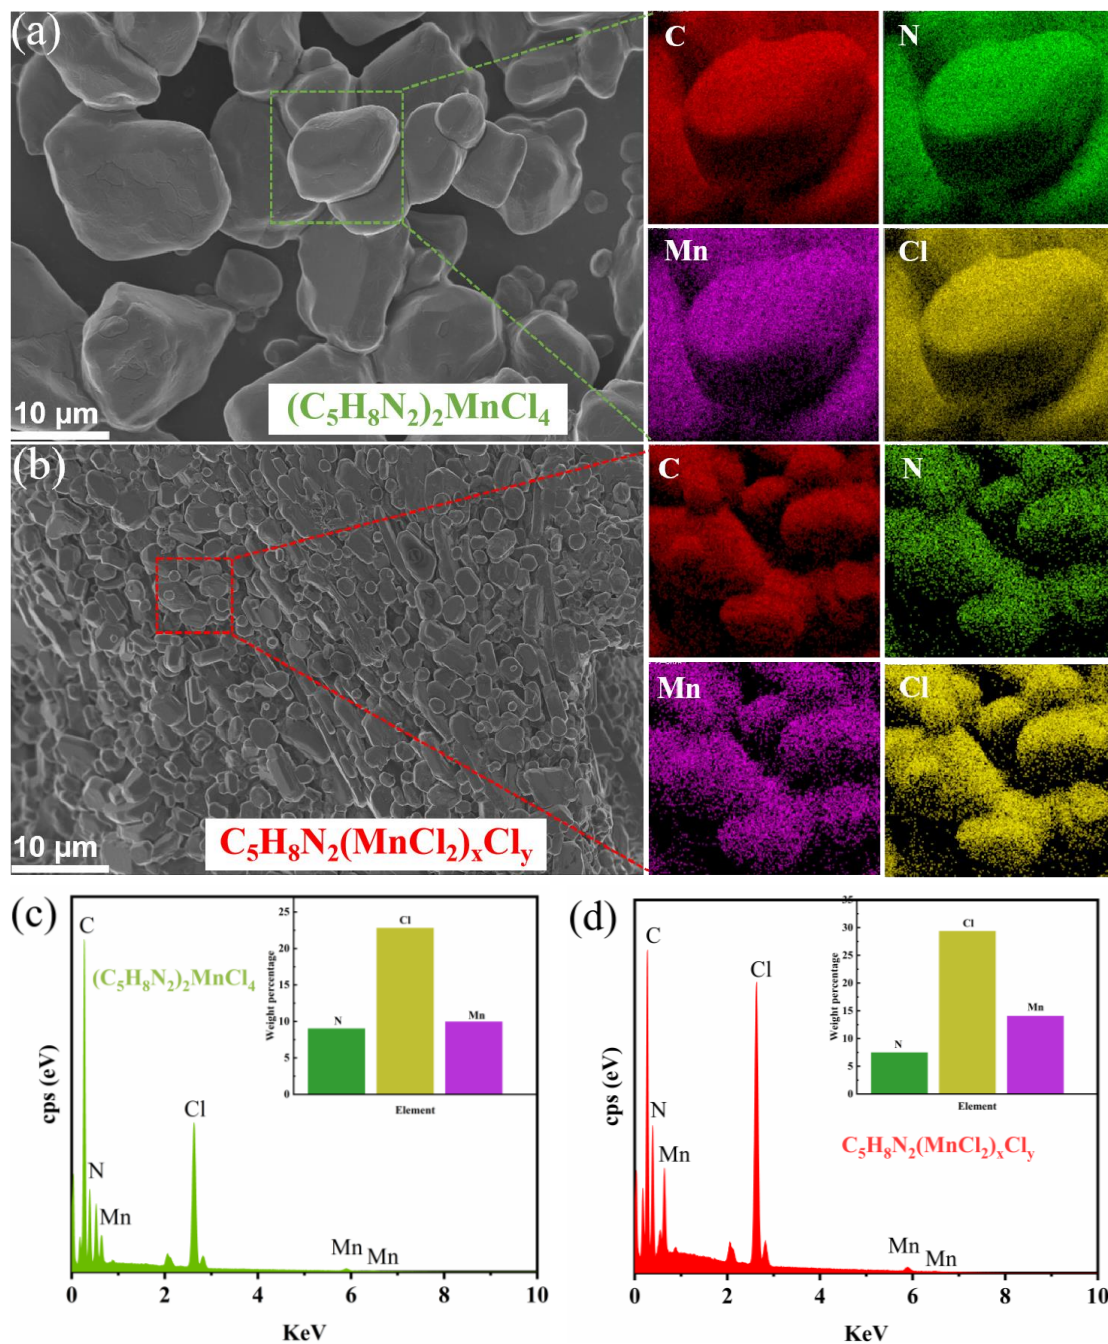

Fig. S1. The morphology and composition characterization of  $(C_5H_8N_2)_2MnCl_4$  and  $C_5H_8N_2(MnCl_2)_xCl_y$ . (a) Scanning electron microscopy (SEM) and energy-dispersive X-ray spectroscopy (EDS) mapping images of  $(C_5H_8N_2)_2MnCl_4$ . (b) SEM image and EDS mapping images of  $C_5H_8N_2(MnCl_2)_xCl_y$ . (c) EDS spectrum of  $(C_5H_8N_2)_2MnCl_4$ . (d) EDS spectrum of  $C_5H_8N_2(MnCl_2)_xCl_y$ .

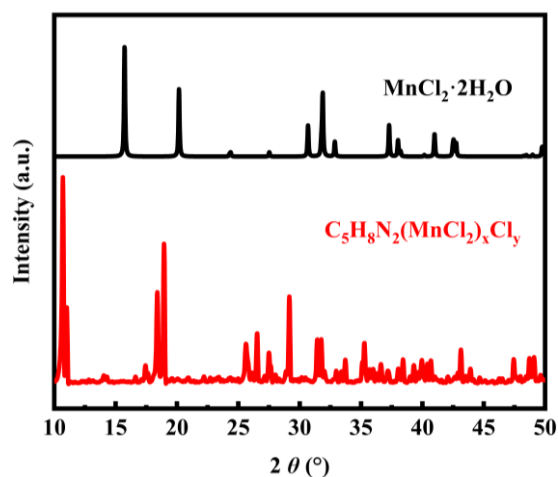

Fig. S2. The powder XRD patterns of  $\text{MnCl}_2 \cdot 2\text{H}_2\text{O}$  and  $\text{C}_5\text{H}_8\text{N}_2(\text{MnCl}_2)_x\text{Cl}_y$ .

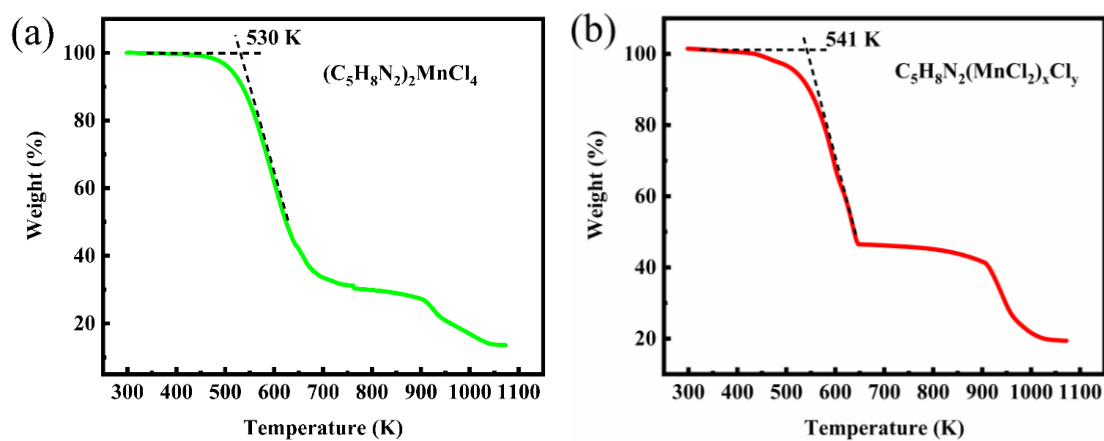

Fig. S3. Thermogravimetric analysis (TGA) patterns of  $(\text{C}_5\text{H}_8\text{N}_2)_2\text{MnCl}_4$  (a) and  $\text{C}_5\text{H}_8\text{N}_2(\text{MnCl}_2)_x\text{Cl}_y$  (b), indicating their good thermal stability.

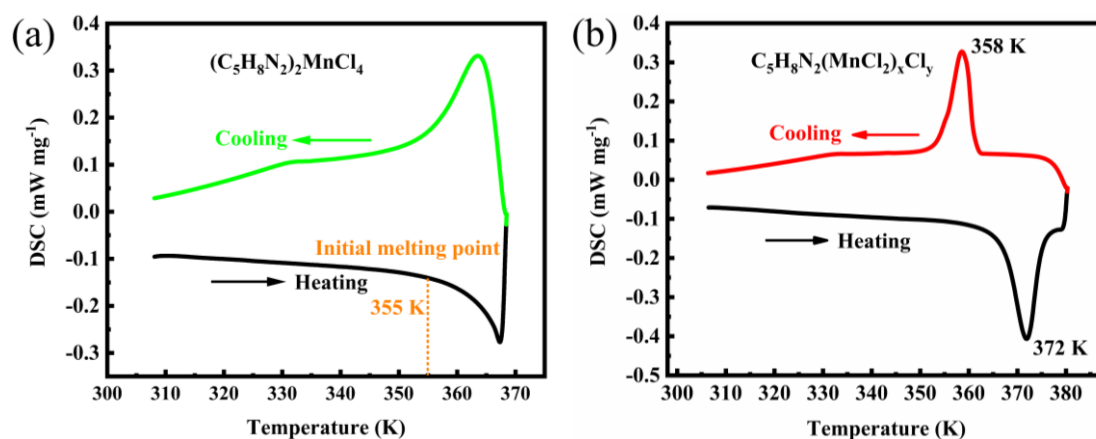

Fig. S4. The differential scanning calorimetry (DSC) patterns of  $(\text{C}_5\text{H}_8\text{N}_2)_2\text{MnCl}_4$  (a) and  $\text{C}_5\text{H}_8\text{N}_2(\text{MnCl}_2)_x\text{Cl}_y$  (b).

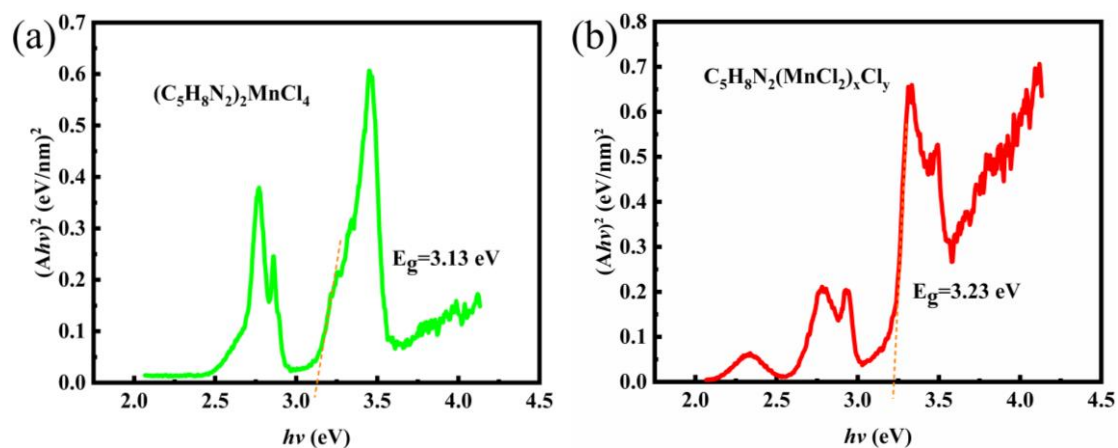

Fig. S5. The Tacu plots of  $(C_5H_8N_2)_2MnCl_4$  (a) and  $C_5H_8N_2(MnCl_2)_xCl_y$  (b), showing the computative band gaps.

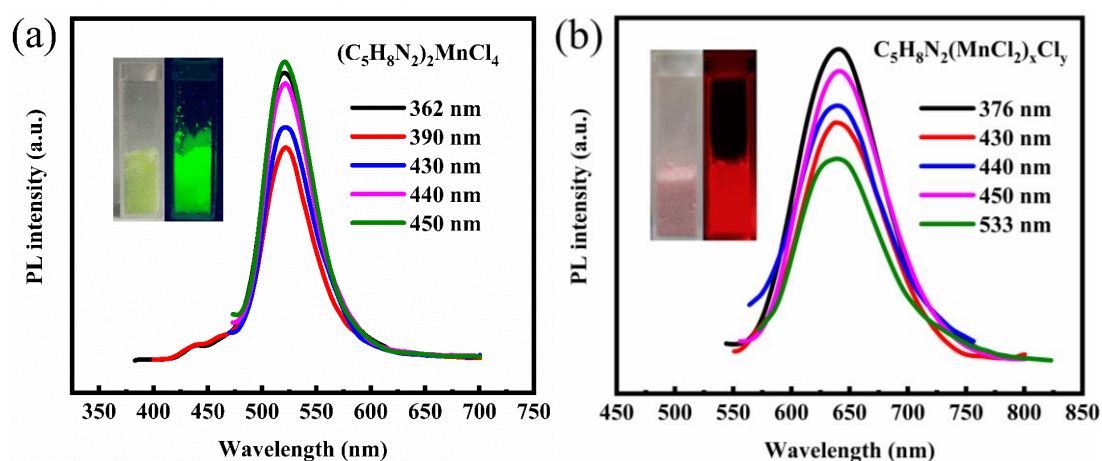

Fig. S6. Emission spectra of  $(C_5H_8N_2)_2MnCl_4$  (a) and  $C_5H_8N_2(MnCl_2)_xCl_y$  (d) in ambient air, under different excitation wavelengths.

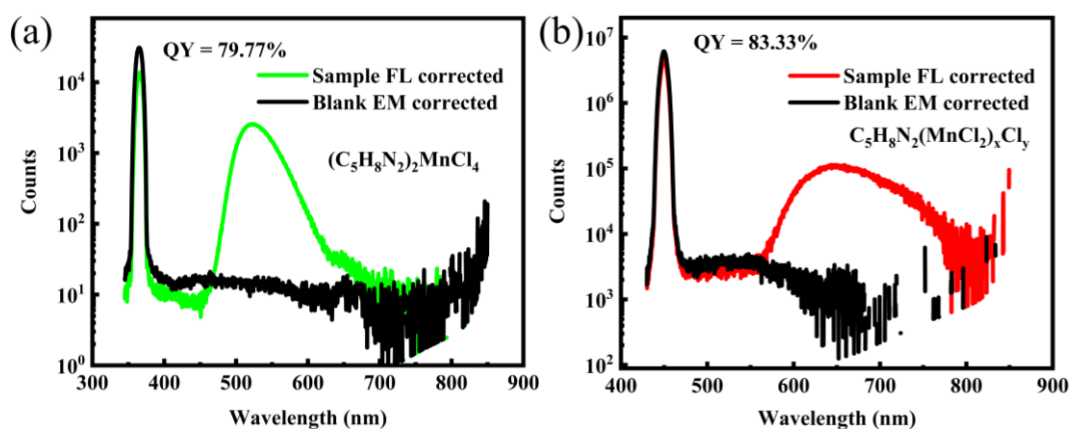

Fig. S7. Photoluminescence quantum yields (PLQYs) spectra of  $(C_5H_8N_2)_2MnCl_4$  (a) and  $C_5H_8N_2(MnCl_2)_xCl_y$  (b), under the excitation wavelengths of 360 nm.

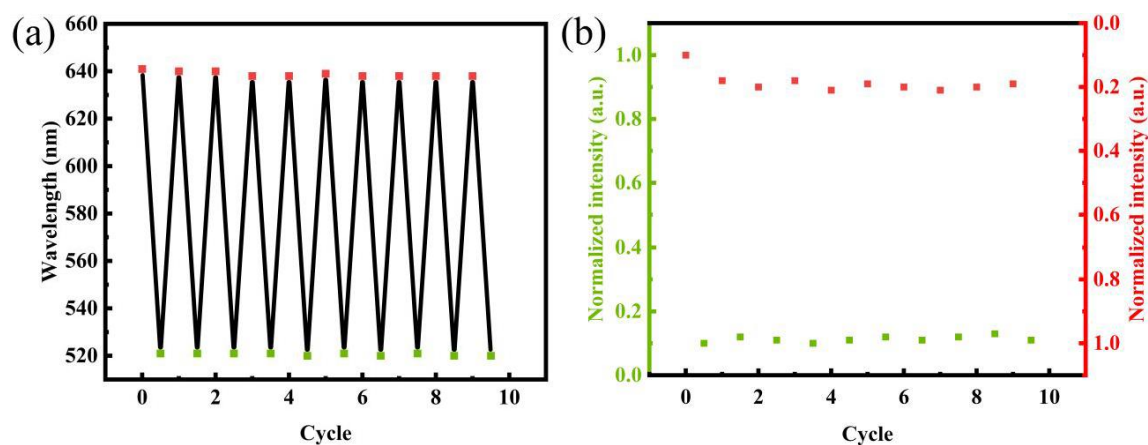

Fig. S8. The cyclic stability of luminescence conversion for  $C_5H_8N_2(MnCl_2)_xCl_y$  to  $(C_5H_8N_2)_2MnCl_4$  indicated by emission peaks positions (a) and intensity (b) under different states. The red points represent  $C_5H_8N_2(MnCl_2)_xCl_y$  and green points present  $(C_5H_8N_2)_2MnCl_4$ .

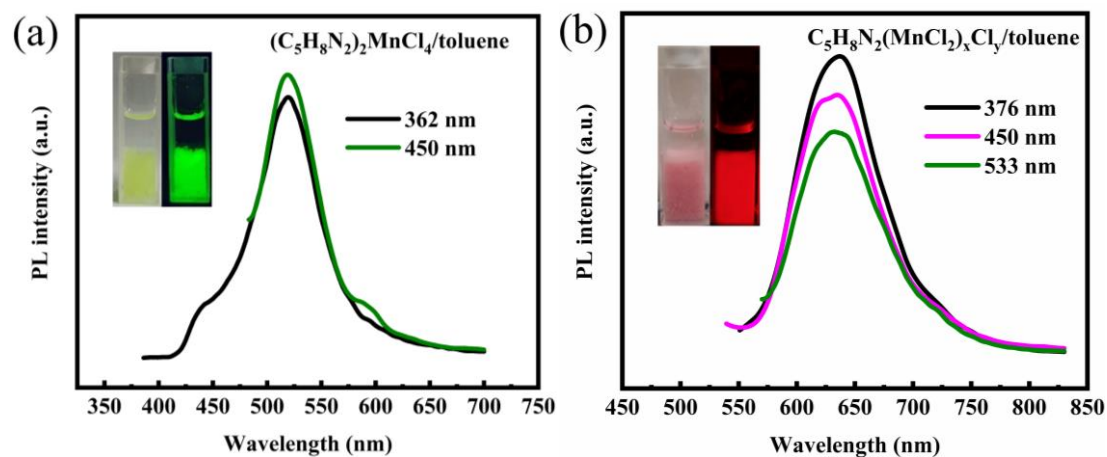

Fig. S9. Emission spectra of  $(C_5H_8N_2)_2MnCl_4$  (a) and  $C_5H_8N_2(MnCl_2)_xCl_y$  (b) in toluene, under different excitation wavelengths.

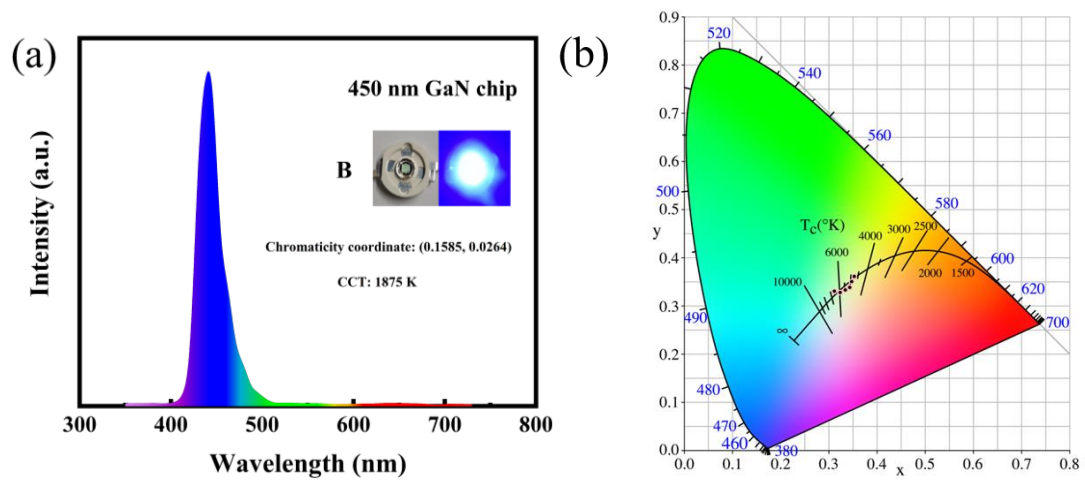

Fig. S10. (a) The emission spectrum of uncovered commercial 450 nm GaN blue LED (B). (b) The chromaticity diagram of the six WLED in Fig. S11.

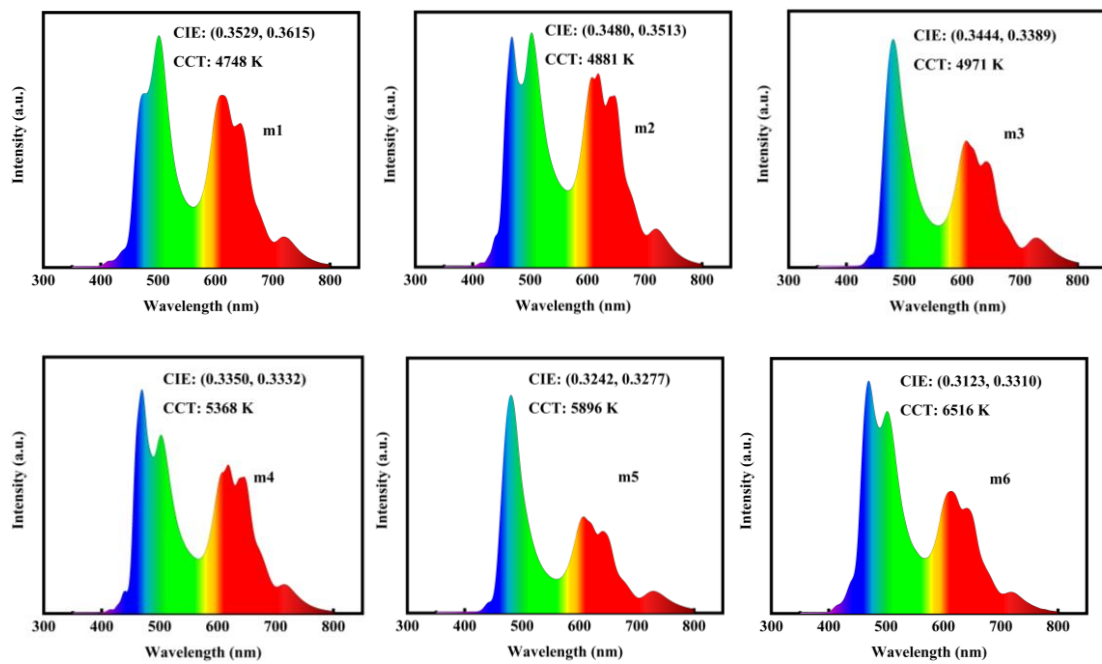

Fig. S11. The emission spectra of fabricated WLEDs ranging from neutral white to cold white.

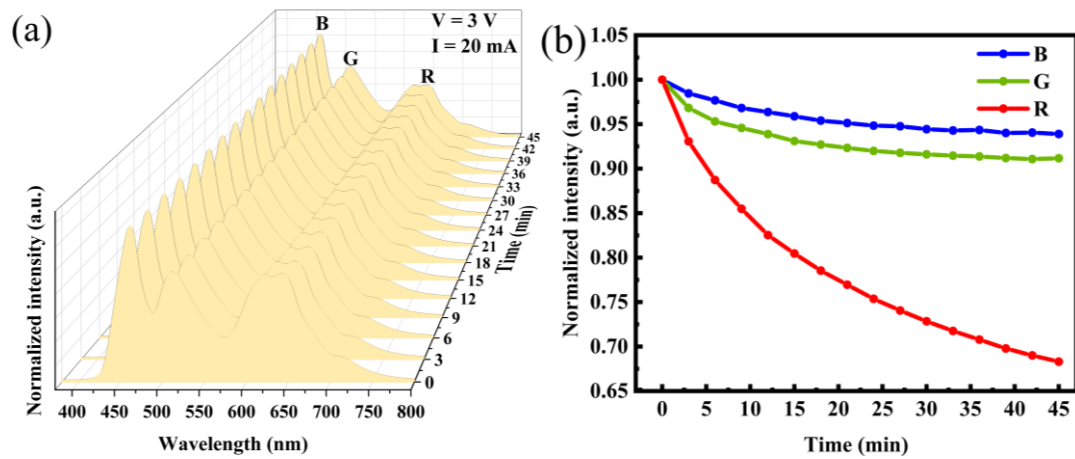

Fig. S12. The long-term stability of the fabricated WLED (m'), the emission spectra of fabricated WLED over time (a) and the change of emission intensity of the peaks (B, G, R) (b).
